# Supplementary material for: Sequence features governing aggregation or degradation of prion-like proteins
Source: PLoS Genet. 2018 Jul 13;14(7):e1007517. doi: 10.1371/journal.pgen.1007517 (PMC6059496; doi:10.1371/journal.pgen.1007517)
Supplement: S1 Table — (XLSX) [file pgen.1007517.s007.xlsx]

## Sheet: Sheet1
				Background corrected raw intensity			Normalized intensity
			Time (hrs):	0	2.5	5	0	2.5	5
Figure	Prion-like domain	Description	Replicate
Fig 3	A2 PrLD	MMIWGRLA	1	1705996	289027	255770	1	0.169418	0.149924
			2	505912	31861	72061	1	0.0629774	0.142438
			3	1140655	163215	91625	1	0.143089	0.0803267
			4	1586377	269829	131696	1	0.170091	0.0830168
			5	1390838	346371	63892	1	0.249038	0.0459378
		AVLLWTSG	1	1329275	73656	8	1	0.0554107	6.01832e-06
			2	904649	102720	2374	1	0.113547	0.00262422
			3	1829902	156315	144288	1	0.0854226	0.0788501
			4	1259802	60333	9537	1	0.0478909	0.00757024
		MVMFFECA	1	2133614	277624	185529	1	0.130119	0.0869553
			2	426368	0	0	1	0	0
			3	542916	21606	1320	1	0.0397962	0.00243132
		LFVIASSK	1	2733317	746009	396025	1	0.272932	0.144888
			2	683688	18358	9179	1	0.0268514	0.0134257
			3	701707	229624	105484	1	0.327236	0.150325
			4	1643103	588747	204021	1	0.358314	0.124168
			5	986740	194151	76689	1	0.19676	0.0777196
		RVLDSFGF	1	1564325	1012594	558865	1	0.647304	0.357256
			2	1581976	789826	784106	1	0.499265	0.49565
			3	889207	416694	243083	1	0.468613	0.273371
			4	1463874	516877	198849	1	0.353088	0.135838
			5	1139339	523110	244557	1	0.459135	0.214648
		WSCSQFRT	1	426803	293523	170868	1	0.687725	0.400344
			2	355838	156456	109741	1	0.439683	0.308402
			3	357525	257338	178717	1	0.719776	0.499873
		TPQTDQDW	1	1298113	843570	1204186	1	0.649843	0.927643
			2	1205726	1108267	954078	1	0.91917	0.791289
			3	1084076	530750	504649	1	0.489587	0.465511
		SGNYNDFG	1	1821887	937444	564199	1	0.514546	0.309678
			2	858127	658040	365078	1	0.766833	0.425436
			3	1167201	1124639	826314	1	0.963535	0.707945
			4	2034753	1068995	995541	1	0.525368	0.489269
			5	1045796	848182	254391	1	0.81104	0.243251
			6	1250701	882720	612125	1	0.70578	0.489426
			7	1560716	900041	898862	1	0.576685	0.575929
			8	1377989	1110647	1131643	1	0.805991	0.821228
			9	1250461	628675	553097	1	0.502755	0.442314
			10	838041	637627	493328	1	0.760854	0.588668
			11	1054559	341487	595988	1	0.32382	0.565154
			12	447953	317175	189169	1	0.708054	0.422297
			13	498574	336734	347767	1	0.675394	0.697523
	Sup35ND	MMIWGRLA	1	631528	378877	369432	1	0.599937	0.584981
			2	1302013	592996	696254	1	0.455446	0.534752
			3	1037878	772209	796985	1	0.744027	0.767899
		AVLLWTSG	1	477550	263152	207716	1	0.551046	0.434962
			2	937417	305134	371334	1	0.325505	0.396125
			3	837083	607359	542610	1	0.725566	0.648215
		MVMFFECA	1	883717	442579	476364	1	0.500815	0.539046
			2	1016854	675992	749804	1	0.664788	0.737376
			3	1195648	926403	1164145	1	0.774812	0.973652
		LFVIASSK	1	1584927	1394185	1049473	1	0.879653	0.662159
			2	774413	605227	770792	1	0.78153	0.995324
			3	1110396	856366	799607	1	0.771226	0.72011
			4	711588	503633	523374	1	0.707759	0.735501
		RVLDSFGF	1	876192	829133	559366	1	0.946291	0.638406
			2	1120283	775002	400710	1	0.691791	0.357686
			3	1880307	1206997	985059	1	0.641915	0.523882
		WSCSQFRT	1	680297	462380	483653	1	0.679674	0.710944
			2	1070345	742481	393522	1	0.693684	0.367659
			3	1721972	1200185	1236528	1	0.696983	0.718088
		TPQTDQDW	1	1273327	854245	835480	1	0.670876	0.656139
			2	1757221	1286369	1314438	1	0.732047	0.748021
			3	1925670	1588915	1523010	1	0.825123	0.790899
		NQQQGNNR	1	1613940	974087	684935	1	0.603546	0.424387
			2	985359	843544	871961	1	0.856078	0.884917
			3	1282486	1126273	709054	1	0.878195	0.552875
Fig 7	A2 ND-GFP	WT	1	479358	374347	312911	1	0.780934	0.652771
			2	359728	321583	352171	1	0.893962	0.978992
			3	47414	37912	37679	1	0.799595	0.794681
		+VL	1	444310	319985	294904	1	0.720184	0.663735
			2	398706	326904	266955	1	0.819912	0.669554
			3	49753	32800	30809.5	1	0.659257	0.619249
		+VLMV	1	252747	200792	147636	1	0.794439	0.584126
			2	273832	183237	63077	1	0.669158	0.230349
			3	28795	20413	9318	1	0.708908	0.323598
		+VLMVLM	1	78024	53338	20406	1	0.68361	0.261535
			2	71974	34728	12618	1	0.482508	0.175313
			3	16957	5156	891	1	0.304063	0.0525447
	Sup35 ND-GFP	WT	1	49539.5	48223	34566	1	0.973425	0.697746
			2	290977	243314	201679	1	0.836197	0.69311
			3	56083	30110	26876	1	0.536883	0.479218
		+VL	1	24183.5	24138	28308	1	0.998119	1.17055
			2	210251	188089	151671	1	0.894593	0.721381
			3	32868	38623.5	39422	1	1.17511	1.1994
		+VLMV	1	22136	29511	20685	1	1.33317	0.934451
			2	170450	116035	82598	1	0.680757	0.484588
			3	35773	39342	27172	1	1.09977	0.759567
		+VLMVLM	1	25920	22008.5	24511	1	0.849093	0.94564
			2	165353	146380	182870	1	0.885258	1.10594
			3	26438	26838	35995	1	1.01513	1.36149
	A2 NM-2xFLAG	WT	1	32512	27606	21242	1	0.849102	0.653359
			2	33416	34586	15242	1	1.03501	0.456129
			3	105857	81887	63756	1	0.773562	0.602284
			4	193285	141021	83944	1	0.729601	0.434302
		+VL	1	16682	6122	2467	1	0.366982	0.147884
			2	14317	4121	2939	1	0.28784	0.20528
			3	44342	15635	5176	1	0.3526	0.116729
			4	72775	28488	11181	1	0.391453	0.153638
		+VLMV	1	10904	436	914	1	0.0399853	0.0838225
			2	12458	1158	1286	1	0.0929523	0.103227
			3	31737	1347	361	1	0.0424426	0.0113747
			4	60135	6532	5631	1	0.108622	0.0936393
		+VLMVLM	1	200987	66853	37926	1	0.332624	0.188699
			2	69133	20500	9832	1	0.29653	0.142219
			3	54459	18017	18874	1	0.330836	0.346573
	Sup35 NM-2xFLAG	WT	1	43646	39750	33984	1	0.910736	0.778628
			2	33772	38483	26600	1	1.13949	0.787635
			3	131219	116622	101256	1	0.888758	0.771657
		+VL	1	39634	41078	39652	1	1.03643	1.00045
			2	41042	33170	36214	1	0.808196	0.882364
			3	127868	108824	92611	1	0.851065	0.72427
		+VLMV	1	50285	43246	39085	1	0.860018	0.77727
			2	58343	51412	43232	1	0.881203	0.740997
			3	150446	113907	111206	1	0.757129	0.739176
		+VLMVLM	1	50179	47587	41236	1	0.948345	0.821778
			2	56762	42305	27502	1	0.745305	0.484514
			3	154978	123617	108109	1	0.797642	0.697576
Fig S3A	A2 PrLD	MMIWGRLA	1	44557			0.276685
			2	14895			0.28499
			3	52237			0.234311
		AVLLWTSG	1	54230			0.336751
			2	23971			0.458643
			3	59888			0.26863
		MVMFFECA	1	64373			0.399735
			2	16302.5			0.31192
			3	46397			0.208115
		LFVIASSK	1	57181			0.355075
			2	22335			0.427341
			3	48707			0.218477
		RVLDFSGF	1	83634			0.51934
			2	23421			0.44812
			3	92182			0.413485
		WSCSQFRT	1	62592			0.388676
			2	15507			0.2967
			3	67978			0.304917
		TPQTDQDW	1	86147			0.534945
			2	30765			0.588635
			3	117985			0.529225
		SGNYNDFG	1	96747			0.600768
			2	36369			0.695858
			3	114209			0.512288
	Sup35 (included on the A2 blots for normalization)		1	161039			1
			2	52265			1
			3	222939			1
	Sup35ND	MMIWGRLA	1	47600			0.650842
			2	88337			0.753854
			3	183452			0.666638
		AVLLWTSG	1	33157			0.453361
			2	60664			0.517697
			3	164749			0.598674
		MVMFFECA	1	44942			0.614499
			2	69372			0.59201
			3	172784			0.627872
		LFVIASSK	1	50085			0.68482
			2	85017			0.725522
			3	170235			0.618609
		RVLDFSGF	1	39592			0.541348
			2	69025			0.589049
			3	167199			0.607577
		WSCSQFRT	1	37515			0.512948
			2	60999			0.520556
			3	176809			0.642498
		TPQTDQDW	1	57760			0.789762
			2	96018			0.819403
			3	219563			0.79786
		NQQQGNNR	1	73136			1
			2	117180			1
			3	275190			1
Fig S3B	A2 PrLD	MMIWGRLA	1	12163			0.0513092
			2	17466			0.0395461
			3	13087			0.0677732
		AVLLWTSG	1	11734			0.0494995
			2	21590			0.0488835
			3	10082			0.0522113
		MVMFFECA	1	11100			0.046825
			2	17120			0.0387627
			3	5830			0.0301916
		LFVIASSK	1	14401			0.0607501
			2	13019			0.0294773
			3	13468			0.0697462
		RVLDFSGF	1	16874			0.0711824
			2	40014			0.0905987
			3	23569			0.122056
		WSCSQFRT	1	11203			0.0472595
			2	41648			0.0942984
			3	20058			0.103874
		TPQTDQDW	1	36172			0.15259
			2	87128			0.197273
			3	51284			0.265583
		SGNYNDFG	1	31473			0.132768
			2	48035			0.10876
			3	27045			0.140057
	Sup35 (included on the A2 blots for normalization)		1	237053			1
			2	441662			1
			3	193100			1
	Sup35ND	MMIWGRLA	1	212927			0.522927
			2	177576			0.65562
			3	146040			0.45232
		AVLLWTSG	1	157854			0.387673
			2	56278			0.207781
			3	110242			0.341445
		MVMFFECA	1	216809			0.532461
			2	179688			0.663418
			3	120153			0.372142
		LFVIASSK	1	177375			0.435615
			2	153139			0.565397
			3	100588			0.311544
		RVLDFSGF	1	110125			0.270456
			2	136974			0.505715
			3	96868			0.300023
		WSCSQFRT	1	166407			0.408679
			2	166330			0.614099
			3	122794			0.380321
		TPQTDQDW	1	262217			0.643978
			2	190125			0.701952
			3	255477			0.791271
		NQQQGNNR	1	407183			1
			2	270852			1
			3	322869			1
Fig S4	A2 PrLD (Δrnq1)	WT	1	111919	79342.5	61489	1	0.708928	0.549406
		+VL	1	61016	18620	9869	1	0.305166	0.161744
		+VLMV	1	77426	3535	1549	1	0.0456565	0.0200062
		+VLMVLM	1	83149	7420	6251	1	0.0892374	0.0751783
	Sup35ND (Δrnq1)	WT	1	210676	137226	120178	1	0.65136	0.57044
		+VL	1	129755	119981	114724	1	0.924673	0.884159
		+VLMV	1	89192	98731	85213	1	1.10695	0.955388
		+VLMVLM	1	173207	167736	190834	1	0.968414	1.10177
Fig S5	A2 Partial GNQ Substitution	MVMFFECA	1	1828334	471101	425066	1	0.257667	0.232488
			2	369761	111188	74690	1	0.300702	0.201995
			3	139253	50289	21096	1	0.361134	0.151494
	A2 Full GNQ Substitution	MVMFFECA	1	1521384	216356	291327	1	0.14221	0.191488
			2	276925	57729	47597	1	0.208464	0.171877
			3	1672027	27293.5	235380	1	0.0163236	0.140775
	A2 Partial GNQ Substitution	LFVIASSK	1	551678	289222	122697	1	0.524259	0.222407
			2	376499	132115	30700	1	0.350904	0.0815407
			3	287739	109557	81058	1	0.380751	0.281707
	A2 Full GNQ Substitution	LFVIASSK	1	605624	71707	537	1	0.118402	0.000886689
			2	289478	94150	33839	1	0.325241	0.116897
			3	288110	118027	20696	1	0.40966	0.0718337
	Sup35 Partial GNQ Substitution	MVMFFECA	1	1555818	762555	368101	1	0.490131	0.236596
			2	87627	74128	34453	1	0.845949	0.393178
			3	717405	509156	170995	1	0.709719	0.238352
	Sup35 Full GNQ Substitution	MVMFFECA	1	1384503	33651	35310	1	0.0243055	0.0255037
			2	87240	1760.5	2288	1	0.02018	0.0262265
			3	673358	126073	14562.5	1	0.18723	0.0216267
	Sup35 Partial GNQ Substitution	LFVIASSK	1	1625861	674777	198695	1	0.415027	0.122209
			2	145266	22277	9391	1	0.153353	0.0646469
			3	96415	13856	8717	1	0.143712	0.0904112
	Sup35 Full GNQ Substitution	LFVIASSK	1	1346426	247354	55710	1	0.183712	0.0413762
			2	86587	3635	1783	1	0.0419809	0.020592
			3	90340	1867	125	1	0.0206664	0.00138366
